# Supplementary material for: Thea2mating-type-locus genelga2ofUstilago maydisinterferes with mitochondrial dynamics and fusion, partially in dependence on a Dnm1-like fission component
Source: Oxford University Press journal article supplement (doi:10.1242/jcs.039354), 2009-06-17
Supplement: jcs039354-sup-039354-tables1.pdf [file jcs039354-sup-039354-tables1.pdf]

**Table S1. *U. maydis* strains**

| <b>Strain</b>            | <b>Genotype</b>                                                                                    | <b>Reference</b>             |
|--------------------------|----------------------------------------------------------------------------------------------------|------------------------------|
| 521                      | <i>a1 b1</i>                                                                                       | Kämper et al., 2006          |
| BUB7                     | <i>a1 b3</i>                                                                                       | Basse et al., 2002           |
| FB1                      | <i>a1 b1</i>                                                                                       | Banuett and Herskowitz, 1989 |
| FB2                      | <i>a2 b2</i>                                                                                       | Banuett and Herskowitz, 1989 |
| FB1/pMB2-2               | <i>a1 b1 Potef-mtGFP-cbx<sup>R,a</sup></i>                                                         | Bortfeld et al., 2004        |
| FB2/pMB2-2               | <i>a2 b2 Potef-mtGFP-cbx<sup>R</sup></i>                                                           | Bortfeld et al., 2004        |
| FB1_mrb1, FB2_mrb1       | <i>a1 b1 mrb1::hyg<sup>R</sup>, a2 b2 mrb1::hyg<sup>R</sup></i>                                    | Bortfeld et al., 2004        |
| FB1_mrb1/pMB2-2          | <i>a1 b1 mrb1::hyg<sup>R</sup> Potef-mtGFP-cbx<sup>R</sup></i>                                     | Bortfeld et al., 2004        |
| FB2_mrb1/pMB2-2          | <i>a2 b2 mrb1::hyg<sup>R</sup> Potef-mtGFP-cbx<sup>R</sup></i>                                     | Bortfeld et al., 2004        |
| FB2_lga2                 | <i>a2 b2 lga2::hyg<sup>R</sup></i>                                                                 | Bortfeld et al., 2004        |
| FB2_rga2                 | <i>a2 b2 rga2::hyg<sup>R</sup></i>                                                                 | Bortfeld et al., 2004        |
| FB2_lga2_rga2            | <i>a2 b2 lga2_rga2::hyg<sup>R</sup></i>                                                            | Bortfeld et al., 2004        |
| FB2/pLIGC1               | <i>a2 b2 cbx::Potef-lga2-eGFP-cbx<sup>R</sup></i>                                                  | Bortfeld et al., 2004        |
| FB2/pMGH1                | <i>a2 b2 mrb1-eGFP-hyg<sup>R</sup></i>                                                             | Bortfeld et al., 2004        |
| MC2 (FB2/pMB2-2/pCLN1)   | <i>a2 b2 Potef-mtGFP-cbx<sup>R</sup> PcrG1-lga2-nat<sup>R,b</sup></i>                              | Bortfeld et al., 2004        |
| MC2_mrb1                 | <i>a2 b2 mrb1::hyg<sup>R</sup> Potef-mtGFP-cbx<sup>R</sup> PcrG1-lga2-nat<sup>R</sup></i>          | Bortfeld et al., 2004        |
| MC2_dnm1                 | <i>a2 b2 dnm1::hyg<sup>R</sup> Potef-mtGFP-cbx<sup>R</sup> PcrG1-lga2-nat<sup>R</sup></i>          | This study                   |
| FB1_dnm1/pMB2-2          | <i>a1 b1 dnm1::hyg<sup>R</sup> Potef-mtGFP-cbx<sup>R</sup></i>                                     | This study                   |
| FB1_dnm1/pMB2-2/pCud1    | <i>a1 b1 dnm1::hyg<sup>R</sup> Potef-mtGFP-cbx<sup>R</sup> PcrG1-dnm1-nat<sup>R</sup></i>          | This study                   |
| FB2/pMB2-2/pCud1         | <i>a2 b2 Potef-mtGFP-cbx<sup>R</sup> PcrG1-dnm1-nat<sup>R</sup></i>                                | This study                   |
| FB2_mrb1_dnm1/<br>pMB2-2 | <i>a2 b2 mrb1::hyg<sup>R</sup> dnm1::nat<sup>R</sup> Potef-mtGFP-cbx<sup>R</sup></i>               | This study                   |
| FB1/pKS1, 2              | <i>a1 b1 PcrG1-mtGFP-cbx<sup>R</sup>, mtRFP-cbx<sup>R</sup></i>                                    | This study                   |
| FB2/pKS1                 | <i>a2 b2 PcrG1-mtGFP-cbx<sup>R</sup></i>                                                           | This study                   |
| FB1_dnm1/pKS2            | <i>a1 b1 dnm1::hyg<sup>R</sup> PcrG1-mtRFP-cbx<sup>R</sup></i>                                     | This study                   |
| FB2_dnm1/pKS1            | <i>a2 b2 dnm1::hyg<sup>R</sup> PcrG1-mtGFP-cbx<sup>R</sup></i>                                     | This study                   |
| FB2_dnm1/pKS1/pCLN1      | <i>a2 b2 dnm1::hyg<sup>R</sup> PcrG1-mtGFP-cbx<sup>R</sup> PcrG1-lga2-cbx<sup>R</sup></i>          | This study                   |
| FB2_lga2/pKS1            | <i>a2 b2 lga2::hyg<sup>R</sup> PcrG1-mtGFP-cbx<sup>R</sup></i>                                     | This study                   |
| FB2_lga2/pKS1/pCLN1      | <i>a2 b2 lga2::hyg<sup>R</sup> PcrG1-mtGFP-cbx<sup>R</sup> PcrG1-lga2-nat<sup>R</sup></i>          | This study                   |
| FB2_lga2_dnm1/pKS1       | <i>a2 b2 lga2::hyg<sup>R</sup> dnm1::nat<sup>R</sup> PcrG1-mtGFP-cbx<sup>R</sup></i>               | This study                   |
| FB2_rga2/pKS1            | <i>a2 b2 rga2::hyg<sup>R</sup> PcrG1-mtGFP-cbx<sup>R</sup></i>                                     | This study                   |
| FB2_lga2_rga2/pKS1, 2    | <i>a2 b2 lga2_rga2::hyg<sup>R</sup> PcrG1-mtGFP-cbx<sup>R</sup>, mtRFP-cbx<sup>R</sup></i>         | This study                   |
| BUB7/pKS2                | <i>a1 b3 PcrG1-mtRFP-cbx<sup>R</sup></i>                                                           | This study                   |
| BUB7/pKS2/pCudg1         | <i>a1 b3 PcrG1-mtRFP-cbx<sup>R</sup> PcrG1-dnm1-eGFP-nat<sup>R</sup></i>                           | This study                   |
| BUB7_dnm1/pKS2           | <i>a1 b3 dnm1::hyg<sup>R</sup> PcrG1-mtRFP-cbx<sup>R</sup></i>                                     | This study                   |
| CV2 (FB2_mrb1/pCV14)     | <i>a2 b2 mrb1::cbx<sup>R</sup> mrb1 N-myc-hyg<sup>R</sup></i>                                      | This study                   |
| CV4 (FB2_mrb1/pCV16)     | <i>a2 b2 mrb1::cbx<sup>R</sup> mrb1-myc-hyg<sup>R</sup></i>                                        | This study                   |
| CV6                      | <i>a2 b2 mrb1::cbx<sup>R</sup> lga2::lga2-myc-nat<sup>R</sup></i>                                  | This study                   |
| FB2/pCFM1                | <i>a2 b2 PcrG1-fzo1-myc-hyg<sup>R</sup></i>                                                        | This study                   |
| MC2/pCFM1                | <i>a2 b2 Potef-mtGFP-cbx<sup>R</sup> PcrG1-lga2-nat<sup>R</sup> PcrG1-fzo1-myc-hyg<sup>R</sup></i> | This study                   |

<sup>a</sup>*Potef*: expression under the constitutive *otef* promoter.

<sup>b</sup>*PcrG1*: expression under the arabinose-inducible *crG1* promoter.
