# Supplementary material for: Thea2mating-type-locus genelga2ofUstilago maydisinterferes with mitochondrial dynamics and fusion, partially in dependence on a Dnm1-like fission component
Source: Oxford University Press journal article supplement (doi:10.1242/jcs.039354), 2009-06-17
Supplement: jcs039354-sup-039354-tables2.pdf [file jcs039354-sup-039354-tables2.pdf]

**Table S2. Oligonucleotides for plasmid construction**

| Name   | Sequence (5' to 3')*                             | Use    |
|--------|--------------------------------------------------|--------|
| pril01 | <b>ggaattccat</b> atgATCGCACGCAACTTGTGC          | pKS1/2 |
| pril02 | CATCGCAAGACCGGCAACAGG                            | pKS1/2 |
| pril03 | aggaattc <b>atta</b> atATGGACGTCGACTTGATTCAGG    | pCud1  |
| pril04 | <b>gaaggcct</b> CCCTTGATCAGCATAAGCACC            | pCud1  |
| pril05 | <b>catatg</b> GCCATGGGCCTGAGTGGCC <b>aa</b> gctt | pCudg1 |
| pril06 | catg <b>ccatgg</b> ACGTCGACTTGATTCAGG            | pCudg1 |
| pril07 | cac <b>ggccgcttggcc</b> GTACTACCACCGCTAGGCTTG    | pCudg1 |
| pril08 | ttgcaag <b>cctgcagg</b> TTGATGAACATGGACGCGAC     | pCV14  |
| pril09 | GGTAACCGAAAACGTGCGCATTGCTATCGATACACTTCTCAAGATCG  | pCV14  |
| pril10 | GATCTTGAGAAGTGTATCGATAGCAATGCGCACGTTTTCGGTTACC   | pCV14  |
| pril11 | agagcgg <b>cctgcagg</b> GcATTGATGAAATCGCGCATG    | pCV14  |
| pril12 | gcagg <b>at</b> atcGAATCCGCTCTCGAGCGTTTAGAG      | pCV14  |
| pril13 | catg <b>ccatgg</b> TCTGCGTCGGCCACAACCTGCAG       | pCV14  |
| pril14 | catgatg <b>cctgcagg</b> CTATATCCGCCCTTCTCTTCACG  | pCV25  |
| pril15 | gtacca <b>acctgcagg</b> GCATCGTCCAGGAAAACGCACATC | pCV25  |
| pril16 | ggacg <b>at</b> atcACCCCCTTTGGTATCTGCCCTC        | pCV25  |
| pril17 | catg <b>ccatgg</b> AATCTGGAGAGCAGGCAAACCAAG      | pCV25  |
| pril18 | <b>ggaattccat</b> atgTCCGACAACCACATCG            | pCFM1  |
| pril19 | <b>ccaatgcat</b> GCCTTCGAGTCCCTTGAC              | pCFM1  |

\*overhangs are in small letters and contained restriction sites are in bold
