# Supplementary material for: Thea2mating-type-locus genelga2ofUstilago maydisinterferes with mitochondrial dynamics and fusion, partially in dependence on a Dnm1-like fission component
Source: Oxford University Press journal article supplement (doi:10.1242/jcs.039354), 2009-06-17
Supplement: jcs039354-sup-039354-tables3.pdf [file jcs039354-sup-039354-tables3.pdf]

**Table S3. Plasmids**

| Name             | Precursor        | Insert, construction                                                                                                                                                                                                                        | Source/Reference                            |
|------------------|------------------|---------------------------------------------------------------------------------------------------------------------------------------------------------------------------------------------------------------------------------------------|---------------------------------------------|
| pUC18            | -                |                                                                                                                                                                                                                                             | Vieira and Messing, 1991                    |
| pSL-Nat          | -                | -                                                                                                                                                                                                                                           | Brachmann, 2001                             |
| pSL-Hyg          | -                | -                                                                                                                                                                                                                                           | Brachmann, 2001                             |
| pRU11            | -                | -                                                                                                                                                                                                                                           | Brachmann et al. 2001                       |
| pS               | -                | -                                                                                                                                                                                                                                           | Basse et al., 2002                          |
| p123             | -                | -                                                                                                                                                                                                                                           | Aichinger et al. 2003                       |
| pMB2-2           | -                | -                                                                                                                                                                                                                                           | Bortfeld et al. 2004                        |
| pCLN1            | -                | -                                                                                                                                                                                                                                           | Bortfeld et al. 2004                        |
| pUMa520          | -                | -                                                                                                                                                                                                                                           | Becht et al., 2006                          |
| pMF5-1n          | -                | -                                                                                                                                                                                                                                           | Becht et al., 2006                          |
| pEP-DC-tetraCmyc | pUC18            | codon usage-adapted tetra <i>myc</i> tag as <i>SbfI/NotI</i> fragment                                                                                                                                                                       | J. Kämper, University of Karlsruhe, Germany |
| pMBR2            | pMB2-2           | <i>mtRFP-NOS</i> terminator ( <i>NOST</i> ), <i>NcoI-AflIII</i> <i>RFP</i> fragment with <i>NOST</i> of pUMa520 cloned into <i>NcoI-AflIII</i> cut pMB2-2                                                                                   | This study                                  |
| pKS1             | pRU11            | <i>crg1</i> promoter- <i>mtGFP-NOST</i> , <i>NdeI/AflIII</i> digested PCR (primers: pril01/02, template: pMB2-2) cloned into <i>NdeI/AflIII</i> cut pRU11                                                                                   | This study                                  |
| pKS2             | pRU11            | <i>crg1</i> promoter- <i>mtRFP-NOST</i> , <i>NdeI/AflIII</i> digested PCR (primers: pril01/02, template: pMBR2) cloned into <i>NdeI/AflIII</i> cut pRU11                                                                                    | This study                                  |
| pCud1v           | pRU11            | <i>crg1</i> promoter- <i>dnm1</i> with 273 bp 3'-region, <i>AseI/StuI</i> digested PCR (primers: pril03/04, template: genomic <i>U. maydis</i> FB2 DNA) cloned into <i>NdeI-HindIII</i> (blunt) cut pRU11                                   | This study                                  |
| pCud1            | pCud1v           | <i>nat</i> cassette, <i>NotI nat</i> fragment of pSL-Nat cloned into <i>NotI</i> cut pCud1v                                                                                                                                                 | This study                                  |
| pRU11-DL1        | pRU11            | linker, <i>NdeI-HindIII</i> linker fragment (pril05) cloned into <i>NdeI-HindIII</i> cut pRU11                                                                                                                                              | This study                                  |
| pCudg1           | pRU11-DL1        | <i>crg1</i> promoter- <i>dnm1-eGFP-nat</i> , <i>NcoI/SfiI</i> digested PCR (primers: pril06/07, template: genomic <i>U. maydis</i> 521 DNA) linked to <i>SfiI</i> cut <i>eGFP-nat</i> of pMF5-1n cloned into <i>NcoI/SfiI</i> cut pRU11-DL1 | This study                                  |
| pCV11            | pEP-DC-tetraCmyc | <i>NOST</i> , <i>NotI/EcoRV NOST</i> fragment of p123 cloned into <i>NotI/EcoRV</i> cut pEP-DC-tetraCmyc                                                                                                                                    | This study                                  |
| pCV14vv          | pCV11            | <i>mrbl_N</i> with 998 bp 5'-region, <i>SbfI</i> digested PCR (primer pairs: pril08/09, pril10/11, template: pS) cloned into <i>SbfI</i> cut pCV11                                                                                          | This study                                  |
| pCV14v           | pCV14vv          | <i>mrbl</i> 649 bp 3'-region, <i>EcoRV/NcoI</i> digested PCR (primers: pril12/13, template: pS) cloned into <i>EcoRV/NcoI</i> cut pCV14vv                                                                                                   | This study                                  |
| pCV14            | pCV14v           | <i>hyg</i> cassette, <i>NotI</i> (blunt) <i>hyg</i> fragment of pSL-Hyg cloned into <i>EcoRV</i> cut pCV14v                                                                                                                                 | This study                                  |
| pCV16            | pCV14            | <i>mrbl</i> with 998 bp 5'-region, 1821 bp <i>SbfI</i> digested PCR (primers: pril08/11, template: pS) replaced 1701 bp <i>SbfI</i> fragment of pCV14                                                                                       | This study                                  |
| pCV25vv          | pCV11            | <i>lga2</i> fragment, <i>SbfI</i> digested PCR (primers: pril14/15, template: genomic <i>U. maydis</i> FB2 DNA) cloned into <i>SbfI</i> cut pCV11                                                                                           | This study                                  |
| pCV25v           | pCV25vv          | <i>lga2</i> 828 bp 3'-region, <i>EcoRV/NcoI</i> digested PCR (primers: pril16/17, template: genomic <i>U. maydis</i> FB2 DNA) cloned into <i>EcoRV/NcoI</i> cut pCV25vv                                                                     | This study                                  |
| pCV25            | pCV25v           | <i>nat</i> cassette, <i>NotI</i> (blunt) <i>nat</i> fragment of pSL-Nat                                                                                                                                                                     | This study                                  |

|        |        |                                                                                                                                                                                                                            |            |
|--------|--------|----------------------------------------------------------------------------------------------------------------------------------------------------------------------------------------------------------------------------|------------|
|        |        | cloned into <i>EcoRV</i> cut pCV25v                                                                                                                                                                                        |            |
| pCFM1v | pRU11  | <i>fzo1</i> , <i>NdeI/NsiI</i> digested PCR (primers: pril18/19, template: genomic <i>U. maydis</i> 521 DNA) linked to <i>SbfI/EcoRV myc-NOST</i> fragment of pCV11 replaced <i>NdeI/HindIII</i> (blunt) fragment of pRU11 | This study |
| pCFM1  | pCFM1v | <i>hyg</i> cassette, <i>NotI</i> (blunt) <i>hyg</i> fragment of pSL- <i>hyg</i> cloned into <i>DraIII</i> (blunt) cut pCFM1v                                                                                               | This study |
